# Supplementary material for: Neurosecretory Protein GL Promotes Normotopic Fat Accumulation in Male ICR Mice
Source: MDPI journal article supplement (doi:10.3390/ijms23126488), 2022-06-10
Supplement: s1 [file s1]

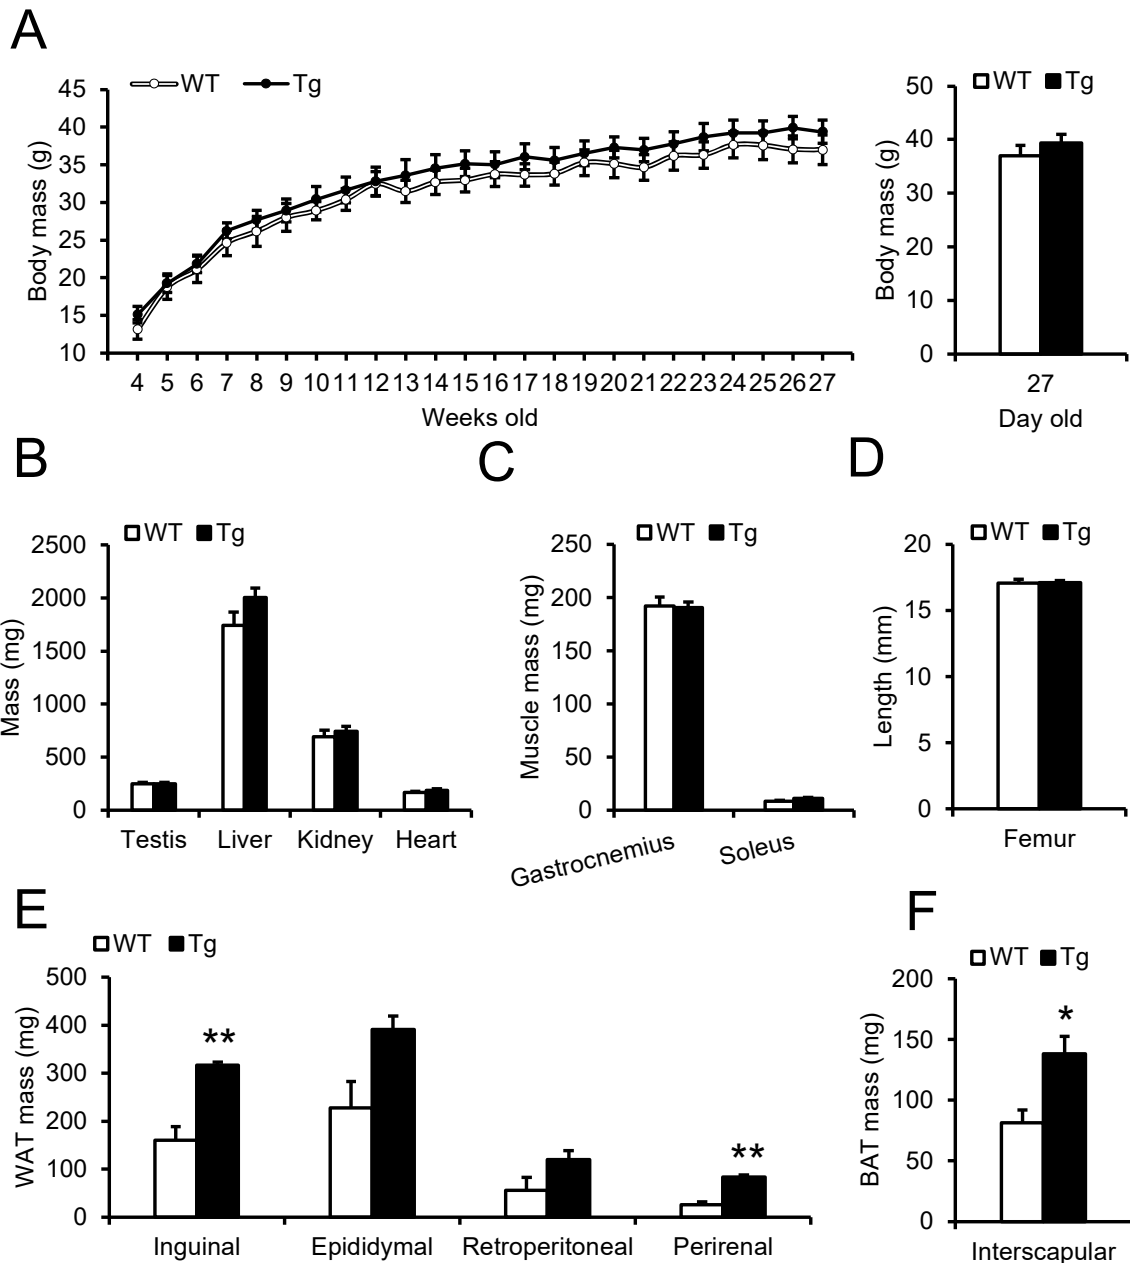

### Supplementary Figure S1.

Phenotypic analysis of body mass and peripheral tissues of the 17-line of *Npgl* Tg mice. (A) Weekly body mass changes (left) and body mass (right) at 27 weeks of age of WT and *Npgl* Tg mice. (B) The masses of the testis, liver, kidney, and heart. (C) The masses of gastrocnemius and soleus muscles. (D) The length of the femur as an index of body length. (E) The masses of inguinal, epididymal, retroperitoneal, and perirenal WAT. (F) The mass of interscapular BAT. All statistical analyses were performed using Mann-Whitney U test. Each value represents the mean  $\pm$  SEM ( $n = 5$ ). Asterisks indicate statistically significant differences (\* $P < 0.05$ , \*\* $P < 0.01$ ). *Npgl*, neurosecretory protein GL; WT, wild-type; Tg, transgenic; WAT, white adipose tissue; BAT, brown adipose tissue.

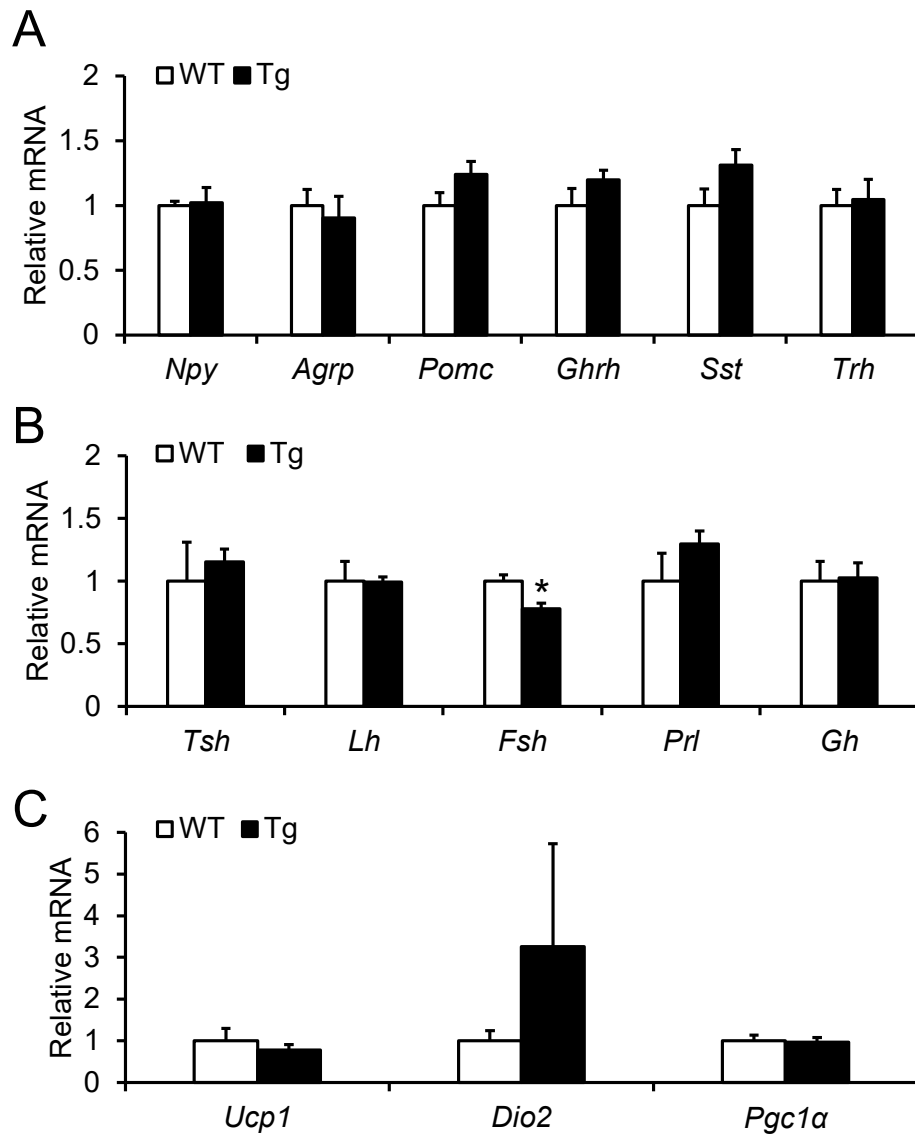

### Supplementary Figure S2.

mRNA expression analysis of adipose tissues of *Npgl* Tg mice. **(A)** The mRNA expression levels of *Npy*, *Agrp*, *Pomc*, *Ghrh*, *Sst*, and *Trh* in the mediobasal hypothalamus. **(B)** The mRNA expression levels of *Tsh*, *Lh*, *Fsh*, *Prl* and *Gh* in the pituitary gland. **(C)** The mRNA expression levels of *Ucp1*, *Dio2*, and *Pgc1α* in interscapular BAT. All statistical analyses were performed using Mann-Whitney U test. Each value represents the mean  $\pm$  SEM (n = 5–8). Asterisk indicates a statistically significant difference (\* $P$  < 0.05). *Npgl*, neurosecretory protein GL; WT, wild-type; Tg, transgenic; *Npy*, neuropeptide Y; *Agrp*, agouti-related peptide; *Pomc*, proopiomelanocortin; *Ghrh*, growth hormone-releasing hormone; *Sst*, somatostatin; *Trh*, thyrotropin-releasing hormone; *Tsh*, thyroid-stimulating hormone; *Lh*, luteinizing hormone; *Fsh*, follicle-stimulating hormone; *Prl*, prolactin; *Gh*, growth hormone; BAT, brown adipose tissue; *Ucp1*, uncoupling protein 1; *Dio2*, type 2 iodothyronine deiodinase; *Pgc1α*, peroxisome proliferator-activated receptor- $\gamma$  coactivator 1 $\alpha$ .
